# Supplementary material
Source: PubMed Central journal article supplement (PMC10164686)
Supplement: NIHMS1877950-supplement-2.pdf [file NIHMS1877950-supplement-2.pdf]

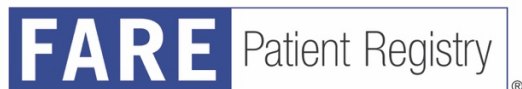

## Survey Instruments

|                                                                       |    |
|-----------------------------------------------------------------------|----|
| <b>Food Allergy History</b> .....                                     | 3  |
| <b>Food Allergy - History</b> .....                                   | 3  |
| <b>Food Allergy - Type</b> .....                                      | 7  |
| <b>Tree Nut Allergy</b> .....                                         | 8  |
| <b>Finned Fish Allergy</b> .....                                      | 8  |
| <b>Shellfish Allergy</b> .....                                        | 9  |
| <b>Bean, Legumes, or Pulses Allergy</b> .....                         | 10 |
| <b>Fruit Allergy</b> .....                                            | 10 |
| <b>Cereal or Grain Allergy</b> .....                                  | 11 |
| <b>Meat Product Allergy</b> .....                                     | 11 |
| <b>Seed Allergy</b> .....                                             | 12 |
| <b>Vegetable Allergy</b> .....                                        | 12 |
| <b>Food Allergy - Recent Reaction</b> .....                           | 13 |
| <b>Food Allergy - Symptoms</b> .....                                  | 14 |
| <b>Food Allergy - Testing, Treatment, &amp; Medical History</b> ..... | 17 |
| <b>Food Allergy - Tolerance</b> .....                                 | 19 |
| <b>Food Allergy - Research and Other</b> .....                        | 20 |
| <b>Food Allergy Reactions</b> .....                                   | 21 |
| <b>Exposure History</b> .....                                         | 21 |
| <b>Medication Use</b> .....                                           | 22 |
| <b>Exposure Circumstance</b> .....                                    | 22 |
| <b>Intentional Exposure</b> .....                                     | 23 |
| <b>Unintentional Exposure</b> .....                                   | 23 |
| <b>Food Allergens</b> .....                                           | 24 |
| <b>Peanut Allergy</b> .....                                           | 24 |
| <b>Tree Nut Allergy</b> .....                                         | 25 |
| <b>Egg Allergy</b> .....                                              | 25 |
| <b>Milk Allergy</b> .....                                             | 25 |
| <b>Shellfish Allergy</b> .....                                        | 26 |

|                                                |    |
|------------------------------------------------|----|
| <b>Fish Allergy</b> .....                      | 26 |
| <b>Sesame Allergy</b> .....                    | 27 |
| <b>Bean, Legumes, or Pulses Allergy</b> .....  | 27 |
| <b>Cereal or Grain Allergy</b> .....           | 28 |
| <b>Fruit Allergy</b> .....                     | 28 |
| <b>Herb or Spice Allergy</b> .....             | 29 |
| <b>Meat Allergy</b> .....                      | 30 |
| <b>Non-food Items</b> .....                    | 31 |
| <b>Seed Allergy</b> .....                      | 31 |
| <b>Vegetable Allergy</b> .....                 | 31 |
| <b>Exposure History 2</b> .....                | 32 |
| <b>Food Label</b> .....                        | 32 |
| <b>Exposure History 3</b> .....                | 33 |
| <b>Dining Out</b> .....                        | 34 |
| <b>Symptoms</b> .....                          | 35 |
| <b>Biphasic Reaction</b> .....                 | 37 |
| <b>Treatment</b> .....                         | 38 |
| <b>Epinephrine Use</b> .....                   | 39 |
| <b>Other</b> .....                             | 40 |
| <b>Mental Health Concerns</b> .....            | 42 |
| <b>Mental Health Concerns</b> .....            | 42 |
| <b>Screening</b> .....                         | 43 |
| <b>Screening Preference</b> .....              | 44 |
| <b>Treatment</b> .....                         | 44 |
| <b>Mental Health Visit</b> .....               | 45 |
| <b>Mental Health Visit 2</b> .....             | 48 |
| <b>Referrals</b> .....                         | 48 |
| <b>Resources</b> .....                         | 49 |
| <b>Resources Types</b> .....                   | 49 |
| <b>Resources 2</b> .....                       | 50 |
| <b>Resources types 2</b> .....                 | 50 |
| <b>Other Resources and Interventions</b> ..... | 51 |

# Food Allergy History

---

## Food Allergy - History

---

### Who is completing this survey?

Select the relationship of the person completing this survey to the registry participant. The participant is the person who has a food allergy.

---

Patient (self)  
Mother  
Father  
Legal guardian  
Spouse  
Grandparent  
Brother/Sister  
Medical caregiver  
Other caregiver (please specify)

---

### What is the participant's current age?

---

Unsure  
0 to 30 days old  
1 to 3 months old  
4 to 7 months old  
8 to 11 months old  
1 year old  
2 years old  
3 years old  
...  
77 years old  
78 years old  
79 years old  
80 or more years old

---

### At what age did the participant first begin experiencing symptoms of food allergies? (e.g. eczema, hives, itching)

---

Unsure  
0 to 30 days old  
1 to 3 months old  
4 to 7 months old

---

8 to 11 months old  
1 year old  
2 years old  
3 years old  
...  
77 years old  
78 years old  
79 years old  
80 or more years old

---

**At what age was the participant diagnosed by a healthcare provider with a food allergy?**

---

Unsure  
0 to 30 days old  
1 to 3 months old  
4 to 7 months old  
8 to 11 months old  
1 year old  
2 years old  
3 years old  
...  
77 years old  
78 years old  
79 years old  
80 or more years old

---

**What type of doctor or healthcare provider first made the food allergy diagnosis?**

---

Unsure  
Did not see a doctor or healthcare provider  
General Practitioner/General Internal Medicine  
Pediatrics  
Allergy/Immunology  
Dermatology  
Gastroenterology  
Emergency Medicine  
Adolescent Medicine  
Anesthesia  
Cardiology  
Child and Adolescent Psychiatry  
Critical Care

---

Dentistry/Oral Surgery  
Developmental/Behavioral Specialist  
Ears, Nose, Throat Surgeon  
Endocrinology  
Family Medicine  
Genetics  
Geriatrics  
Hematology  
Infectious Disease  
Metabolism  
Neonatology  
Nephrology (kidney)  
Neurology  
Nutrition  
Obstetrics/Gynecology  
Oncology  
Ophthalmology  
Orthopedics  
Pain Management  
Physical Medicine and Rehabilitation  
Plastic Surgery  
Psychiatry/Psychology  
Pulmonology  
Radiology  
Rheumatology  
Sports Medicine  
Surgery  
Urology  
Other type of doctor or healthcare provider (please specify)

---

**What hospital or clinical center does the participant visit for diagnosis, treatment and follow-ups?**

---

- 1 - Lurie Children's Hospital (Chicago, IL)
- 2 - Arkansas Children's Hospital (Little Rock, AR)
- 3 - Boston Children's Hospital (Boston, MA)
- 4 - Children's Hospital Colorado (Aurora, CO)
- 5 - Children's Mercy Kansas City (Kansas City, KS)
- 6 - Children's National (Washington, DC)
- 7 - Cincinnati Children's Hospital (Cincinnati, OH)
- 8 - Columbia/NewYork-Presbyterian (New York, NY)
- 9 - Children's Hospital Los Angeles (Los Angeles, CA)
- 10 - Mount Sinai Health System (New York, NY)

- 
- 11 - Massachusetts General Hospital (Boston, MA)
  - 12 - National Jewish Health (Denver, CO)
  - 13 - Rady Children's Hospital (San Diego, CA)
  - 14 - Riley Hospital for Children at Indiana University Health (Indianapolis, IN)
  - 15 - Stanford Food Allergy Center (Stanford, CA)
  - 16 - Dell Children's Medical Group, DCMC (Austin, TX)
  - 17 - Texas Children's Hospital Food Allergy Program (Houston, TX)
  - 18 - Children's Hospital of Philadelphia (CHOP) (Philadelphia, PA)
  - 19 - Northwest Asthma and Allergy Center (Seattle, WA)
  - 20 - University of Chicago Medicine Comer Children's Hospital (Chicago, IL)
  - 21 - UCLA (Los Angeles, CA)
  - 22 - UNC - University of North Carolina (Chapel Hill, NC)
  - 23 - University of Arizona - Banner University Medical Center (Tucson, AZ)
  - 24 - Michigan Medicine (Ann Arbor, MI)
  - 25 - Golisano's Children's Hospital (Rochester, NY)
  - 26 - University of South Florida/Johns Hopkins All Children's Hospital (St. Petersburg, FL)
  - 27 - University of South Florida (Tampa, FL)
  - 28 - Children's Medical Center (Dallas, TX)
  - 29 - Virginia Mason Medical Center (Seattle, WA)
  - 30 - Cohen Children's Medical Center of NY (Great Neck, NY)
  - 31 - Vanderbilt University Medical Center (Nashville, TN)
  - 32 - Children's Hospital of Pittsburgh of UPMC (Pittsburgh, PA)
  - 33 - Primary Children's Hospital (Salt Lake City, UT)
- Unsure / Other - Please select "other" below and specify  
Other hospital or clinical center (please specify)
- 

**What led to the initial medical evaluation? (Select all that apply.)**

---

- Diagnosis of a family member
  - Noticed from unrelated lab test (blood test, urine test, etc.)
  - Noticed from an unrelated tissue test (biopsy, surgery, operation, etc.)
  - Symptoms noticed by patient/family
  - Symptoms noticed by medical provider
  - Symptoms noticed by other professional (teacher, daycare, coach, etc.)
  - None of the above
  - Unsure
  - Other, please specify
- 

**Does the participant have any close relatives (mother, father, brother, sister) that have food allergies?**

---

Yes  
No  
Unsure

---

**On average, how many food allergy reactions does the participant have per year?**

---

Never had a reaction  
Less than once per year  
One time a year  
2 to 3 times a year  
4 to 6 times a year  
7 to 11 times a year  
1 to 3 times per month  
1 or more times per week  
Unsure

---

**Approximately how many times has the participant experienced the following because of food allergies?**

---

| <b>Answers</b>                            | <b>Answer Columns</b>    |
|-------------------------------------------|--------------------------|
| Admitted to the hospital                  | Number of Times Occurred |
| Admitted to the Intensive Care Unit (ICU) | Unsure                   |
| Visited an Urgent Care facility           | 0                        |
| Visited the Emergency Room                | 1                        |
|                                           | 2                        |
|                                           | 3                        |
|                                           | 4                        |
|                                           | 5                        |
|                                           | 6                        |
|                                           | 7                        |
|                                           | 8                        |
|                                           | 9                        |
|                                           | 10                       |
|                                           | More than 10             |

---

### **Food Allergy - Type**

---

**Has the participant ever been diagnosed by a doctor as allergic to any of the following foods or food groups? (Select all that apply.)**

---

Peanut  
Tree Nuts  
Egg  
Milk  
Finned Fish  
Shellfish  
Soy  
Wheat (gluten)  
Beans, Legumes, Pulses  
Fruits  
Cereals & Grains  
Meats  
Seeds  
Vegetables  
None of the above

---

**Does the participant have any food allergies not listed above?**

---

No  
Unsure  
Yes (please specify)

---

## **Tree Nut Allergy**

---

**Has the participant been diagnosed by a doctor as allergic to any of the following TREE NUTS?  
(Select all that apply.)**

---

Almond  
Brazil nut  
Cashew  
Chestnut  
Coconut  
Hazelnut  
Macadamia nut  
Pecan  
Pine nut  
Pistachio  
Walnut  
Other TREE NUTS (please specify)

---

## **Finned Fish Allergy**



---

**Has the participant been diagnosed by a doctor as allergic to any of the following FINNED FISH?  
(Select all that apply.)**

---

- Anchovies
- Bass
- Catfish
- Cod
- Eel
- Flounder
- Haddock
- Hake
- Halibut
- Herring
- Mackerel
- Megrim
- Perch
- Plaice
- Pollock
- Salmon
- Sardine
- Snapper
- Swordfish
- Tilapia
- Trout
- Tuna
- Whitefish
- Other FINNED FISH (please specify)

---

### **Shellfish Allergy**

---

**Has the participant been diagnosed by a doctor as allergic to any of the following SHELLFISH?  
(Select all that apply.)**

---

- Clam
- Crab
- Crayfish
- Lobster
- Octopus
- Oyster
- Scallop
- Squid

---

Shrimp  
Other SHELLFISH (please specify)

---

## **Bean, Legumes, or Pulses Allergy**

---

**Has the participant been diagnosed by a doctor as allergic to any of the following BEANS, LEGUMES, or PULSES? (Select all that apply.)**

---

Black beans  
Chickpea  
Green beans  
Lentils  
Lima beans  
Navy beans  
Red kidney beans  
Peas  
Pinto beans  
Other BEANS, LEGUMES, or PULSES (please specify)

---

## **Fruit Allergy**

---

**Has the participant been diagnosed by a doctor as allergic to any of the following FRUITS? (Select all that apply.)**

---

Apple  
Apricot  
Avocado  
Banana  
Blackberry  
Blueberry  
Carambola  
Carob  
Cherry  
Coconut  
Cranberry  
Currant  
Date  
Grape  
Grapefruit  
Guava  
Jackfruit

---

Kiwifruit  
Lemon  
Lime  
Mandarin  
Mango  
Melon  
Olive  
Orange  
Papaya  
Passion fruit  
Peach  
Pear  
Persimmon  
Pineapple  
Plum  
Raspberry  
Strawberry  
Watermelon  
Other FRUITS (please specify)

---

### **Cereal or Grain Allergy**

---

**Has the participant been diagnosed by a doctor as allergic to any of the following CEREALS or GRAINS? (Select all that apply.)**

---

Barley  
Buckwheat  
Corn  
Gluten  
Hops  
Malt  
Millet  
Oat  
Rapeseed  
Rice  
Rye  
Spelt  
Wheat  
Other CEREALS or GRAINS (please specify)

---

### **Meat Product Allergy**

---

---

**Has the participant been diagnosed by a doctor as allergic to any of the following MEAT PRODUCTS? (Select all that apply.)**

---

Beef  
Chicken  
Duck  
Elk or moose  
Gelatin  
Horse  
Lamb  
Pork  
Rabbit  
Turkey  
Venison  
Other MEAT PRODUCTS (please specify)

---

### **Seed Allergy**

---

**Has the participant been diagnosed by a doctor as allergic to any of the following SEEDS? (Select all that apply.)**

---

Fennel seed  
Flaxseed  
Mustard  
Poppy  
Pumpkin  
Sesame  
Sunflower  
Other SEEDS (please specify)

---

### **Vegetable Allergy**

---

**Has the participant been diagnosed by a doctor as allergic to any of the following VEGETABLES? (Select all that apply.)**

---

Asparagus  
Bamboo shoot  
Beets  
Broccoli  
Brussels sprout  
Cabbage  
Carrot

---

Cauliflower  
Celery  
Cucumber  
Eggplant  
Lettuce  
Onion  
Parsley  
Pepper  
Potato, sweet  
Potato, white  
Spinach  
Squash, pumpkin  
Tomato  
Other VEGETABLES (please specify)

---

### **Food Allergy - Recent Reaction**

---

**When did participant's last allergic reaction to foods occur?**

---

Today  
Yesterday  
Within the past week  
2 to 3 weeks ago  
1 to 3 months  
4 to 6 months  
7 to 12 months  
1 year  
2 years  
3 years  
4 years  
5 or more years  
Unsure

---

**Where did the participant's most recent allergic reaction to foods occur?**

---

College  
Daycare  
Home  
Restaurant/eating out  
School

---

Work  
Other location (please specify)

---

**Thinking about the participant's most recent allergic reaction, how soon after the participant was exposed to the food(s) did the reaction occur?**

---

0 to 5 minutes  
6 to 10 minutes  
11 to 20 minutes  
21 to 30 minutes  
31 to 40 minutes  
41 to 50 minutes  
51 to 60 minutes  
2 hours  
3 hours  
4 or more hours  
Unsure

---

**Have any family members had a similar reaction after eating the same food(s)?**

---

Yes  
No  
Unsure

---

## **Food Allergy - Symptoms**

---

**Choose the SKIN symptoms that the participant developed within 2 hours of eating the food or foods that produce an allergic reaction. (Select all that apply.)**

---

Hives (welts, urticaria)  
Itching  
Flushing  
Swelling (angioedema)  
Rash (redness of skin)  
Red, itchy or watery eyes  
None  
Unsure  
Other SKIN symptoms (please specify)

---

**Choose the RESPIRATORY (lungs/breathing) symptoms that the participant developed within 2 hours of eating the food or foods that produce an allergic reaction. (Select all that apply.)**

---

---

Chest tightening  
Chest pain  
Coughing  
Hoarse voice  
Nasal congestion/stuffy or runny nose  
Sneezing  
Trouble breathing (shortness of breath)  
Wheezing  
None  
Unsure  
Other RESPIRATORY symptoms (please specify)

---

**Choose the GASTROINTESTINAL (digestive tract) symptoms that the participant developed within 2 hours of eating the food or foods that produce an allergic reaction. (Select all that apply.)**

---

Bloating  
Bloody stools  
Constipation  
Diarrhea  
Difficulty swallowing  
Itchy throat/ear canal  
Nausea  
Odd taste in mouth/metallic taste  
Reflux  
Stomach pain/cramps  
Tingling mouth  
Tongue swelling/throat tightness  
Vomiting  
None  
Unsure  
Other GASTROINTESTINAL symptoms (please specify)

---

**Choose the CARDIOVASCULAR (heart) symptoms that the participant developed within 2 hours of eating the food or foods that produce an allergic reaction. (Select all that apply.)**

---

A weak pulse  
Cardiac arrest  
Chest pain  
Irregular heart rate  
Lightheadedness/dizziness  
Low blood pressure

---

Rapid heartbeat (tachycardia)  
Slow heartbeat (bradycardia)  
Turning blue  
None  
Unsure  
Other CARDIOVASCULAR symptoms (please specify)

---

**Choose the EMOTIONAL/BEHAVIORAL symptoms that the participant developed as a result of eating the food or foods that produce an allergic reaction. (Select all that apply.)**

---

Anxiety  
Confusion  
Depression  
Fatigue  
Headache  
Irritability  
Feeling of "impending doom"  
Panic  
Sleep disturbances  
Withdrawal from social and recreational activities  
None  
Unsure  
Other EMOTIONAL/BEHAVIORAL symptoms (please specify)

---

**Choose the AUTONOMIC (involuntary) symptoms that the participant developed as a result of eating the food or foods that produce an allergic reaction. (Select all that apply.)**

---

Abnormal sweating  
Dry skin  
Dehydration  
Fainting or loss of consciousness  
Sexual dysfunction  
Urinary dysfunction  
Uterine contractions  
Weight loss  
None  
Unsure  
Other AUTONOMIC symptoms (please specify)

---

**Choose the MOTOR (muscle) symptoms that the participant developed as a result of eating the food or foods that produce an allergic reaction. (Select all that apply.)**



---

Arm weakness  
Clawing of toes  
Leg weakness  
Muscle wasting  
None  
Unsure  
Other MOTOR symptom (please specify)

---

**Please describe any OTHER symptoms that the participant developed within 2 hours of eating the food or foods that produce an allergic reaction.**

---

## **Food Allergy - Testing, Treatment, & Medical History**

---

**Which of the following diagnostic tests were performed to FIRST diagnose the food allergy or allergies? (Select all that apply.)**

---

Allergy skin scratch/skin prick test  
Blood tests - food-specific IgE antibodies (RAST, ImmunoCAP, ELISA)  
Food diary  
Food elimination diet  
Oral food challenge  
Patch testing  
Screening allergy labs  
None  
Unsure  
Other (please specify)

---

**Which of these medications does the participant receive to treat an allergic reaction? (Select all that apply.)**

---

Atropine  
Bronchodilator (Albuterol)  
Epinephrine (Intramuscular or IM; EpiPen, Adrenaclick, Auvi-Q, Generic)  
Epinephrine (Intravenous or IV)  
Glucagon  
Oral corticosteroids (Prednisone, methylprednisone)  
Oxygen therapy  
Topical corticosteroids (Hydrocortisone, Aristocort)  
Type 1 antihistamines (Benadryl, Zyrtec, Claritin, Allegra)  
Type 2 antihistamines (Axid, Pepcid, Tagamet, Tazac, Zantac)

---

None  
Unsure  
Other medication (please specify)

---

**Is the administered food allergy treatment successful in relieving symptoms?**

---

Never  
Almost never  
Sometimes  
Often  
Almost always  
Always  
Unsure

---

**Are there other therapies or interventions the participant may have discovered that help reduce the severity and frequency of food allergy reactions or symptoms? Please Explain.**

---

**Has the participant ever been diagnosed with any of the following conditions? (Select all that apply.)**

---

Allergic rhinitis (hay fever)  
Anaphylaxis  
Arrhythmias  
Asthma  
Atopic dermatitis (eczema)  
Attention-deficit/hyperactivity disorder (ADHD)  
Autism  
Bee sting allergy  
Cancer  
Celiac disease  
Connective tissue disorder  
Contact dermatitis  
Drug allergy  
Eosinophilic esophagitis  
Food protein-induced enterocolitis syndrome (FPIES)  
Gluten sensitivity  
Heartburn (acid reflux)  
Heart defects  
Heart disease  
High blood pressure (hypertension)

---

Histamine toxicity (scombroid poisoning)  
Hypertension  
Hyper-IgE syndrome (HIE)  
Inflammatory bowel disease (Crohn's disease/ulcerative colitis)  
Irritable bowel syndrome  
Lactose intolerance  
Latex allergy  
Mast cell disease  
Migraine headaches  
Oral allergy syndrome (OAS)/pollen-food syndrome  
Osteoarthritis  
Rheumatoid arthritis  
Stroke  
Type 1 diabetes  
Type 2 diabetes  
Thyroid disease  
None  
Unsure  
Other (please specify)

---

**Has the participant outgrown or developed tolerance (not allergic) to any food/food groups that previously produced an allergic reaction?**

---

Yes  
No  
Unsure

---

## **Food Allergy - Tolerance**

---

**Which past food allergens is the participant now able to eat? (Select all that apply.)**

---

Peanut  
Egg  
Milk  
Finned Fish  
Shellfish  
Soy  
Wheat (gluten)  
Beans, Legumes, Pulses  
Fruits  
Cereals & Grains

---

Meats  
Seeds  
Vegetables  
Other foods (please specify)

---

**Which of the following TREE NUTS is the participant now able to eat? (Select all that apply.)**

---

Almond  
Brazil nut  
Cashew  
Chestnut  
Coconut  
Hazelnut  
Macadamia nut  
Pecan  
Pine nut  
Pistachio  
Walnut  
None  
Other TREE NUTS (please specify)

---

## **Food Allergy - Research and Other**

---

**How did the participant learn about the FARE Patient Registry?**

---

Food Allergy Research & Education website  
Doctor or healthcare provider  
Family or friends  
Social media  
Web search engine  
Other (Please specify)

---

**Is the participant willing to be contacted in the future about participating in research studies, clinical trials and other developments?**

---

Yes  
No  
Unsure

---

**Please share any additional information about the participant's food allergy history and experience.**

---
