# Supplementary material
Source: PubMed Central journal article supplement (PMC10164686)
Supplement: NIHMS1877950-supplement-3.pdf [file NIHMS1877950-supplement-3.pdf]

# Food Allergy Reactions

---

## Exposure History

---

### Who is completing this survey?

The participant is the person who has a food allergy. Select your relationship to the participant.

---

- Myself (participant)
  - Mother of participant
  - Father of participant
  - Legal guardian of participant
  - Other (please specify)
- 

### What is the participant's current age?

---

- Unsure
  - 0 to 30 days old
  - 1 to 3 months old
  - 4 to 7 months old
  - 8 to 11 months old
  - 1 year old
  - 2 years old
  - 3 years old
  - ...
  - 77 years old
  - 78 years old
  - 79 years old
  - 80 or more years old
  - Participant is deceased
- 

### When did the participant's most recent food allergy reaction occur?

If unsure, please approximate the date.

---

Date

---

### How severe do you feel the participant's most recent food allergy reaction was?

---

- Mild
- Moderate
- Severe
- Very severe
- Unsure

---

**Did you report this food allergy reaction to your doctor, allergist, or primary care provider?**

---

- Yes
- No
- Unsure

---

**Did the participant experience any of the following around the time of the food allergy reaction? (Select all that apply.)**

---

- Blood transfusion
- Bone marrow/organ transplantation
- Alcohol consumption
- Exercise before eating
- Exercise after eating
- Medication use (including over the counter drugs and supplements)
- Infection or viruses
- Stress
- Tick bite
- Lack of sleep
- Travel abroad
- Menstrual period
- Vaccination or vaccine
- None of the above
- Unsure

---

## **Medication Use**

---

**Please specify which medication(s) was taken around the time of the participant's reaction. (Select all that apply.)**

---

- Antibiotics
- Antidepressants
- Epinephrine
- Heart medications
- Inhaled asthma medication
- Non-steroidal anti-inflammatory drugs (NSAIDs, e.g., aspirin, ibuprofen)
- Unsure
- Other (please specify)

---

## **Exposure Circumstance**

---

**Was the participant's food allergy exposure:**

---

Intentional (non-accidental)  
Unintentional (accidental)  
Unsure

---

**Who was the participant with during the food allergy reaction?**

---

Alone  
One other person  
Small group (3 to 10 individuals)  
Large group (11 or more individuals)  
Unsure

---

### **Intentional Exposure**

---

**Why do you think the participant experienced this intentional (non-accidental) reaction? (Select all that apply.)**

---

Bullying  
Didn't believe seriousness of food allergy  
Decided to take the risk anyway  
Never had serious reaction before  
Not aware of risk  
Not aware that past reactions don't predict future reactions  
Peer pressure  
Unsure  
Other (please specify)

---

### **Unintentional Exposure**

---

**Why do you think the participant experienced this unintentional (accidental) reaction? (Select all that apply.)**

---

Child grabbed food unknowingly  
Cross-contact with food allergen  
Did not read the food label/menu  
Did not inform staff about the participant's food allergy  
Food allergen hidden in food and not listed on food label  
Food label/menu was not clear  
Had eaten this food previously without a reaction (new allergen suspected)  
Informed staff of food allergy but reaction still occurred  
No ingredients listed/menu not available

---

Unsure  
Other (please specify)

---

## **Food Allergens**

---

**What food allergen was the participant exposed to?**

---

Peanut  
Tree nuts  
Egg  
Milk  
Shellfish  
Soy  
Wheat (includes wheat gluten)  
Finned fish  
Sesame  
Mustard  
Beans, legumes, or pulses (other than soy)  
Cereals and grains (other than wheat)  
Fruits  
Herbs or spices  
Meats  
Non-food items  
Seeds (other than mustard, sesame)  
Vegetables  
Other

---

**If you selected "Other" above, please enter the allergen in the space provided:**

---

No  
Unsure  
Yes (please specify)

---

## **Peanut Allergy**

---

**In what form was PEANUT ingested?**

---

Boiled  
Fried  
Peanut butter  
Peanut oil

---

Raw  
Roasted  
Unsure

---

## Tree Nut Allergy

---

**Which TREE NUT caused the most recent allergic reaction?**

---

Almond  
Brazil nut  
Cashew  
Chestnut  
Coconut  
Hazelnut  
Macadamia nut  
Pecan  
Pine nut  
Pistachio  
Walnut  
Other TREE NUTS (please specify)

---

## Egg Allergy

---

**Was this an allergic reaction to baked (heated) EGG?**

---

Yes  
No  
Unsure

---

**Does the participant ever experience a food allergy reaction to EGG in a baked food or heated food with EGG in it (e.g. waffles, noodles)?**

---

Yes  
No  
Unsure

---

## Milk Allergy

---

**Was this an allergic reaction to baked (heated) MILK?**

---

---

Yes  
No  
Unsure

---

**Does the participant ever experience a food allergy reaction to MILK in a baked food or heated food with MILK in it (e.g. waffles, pancakes)?**

---

Yes  
No  
Unsure

---

## **Shellfish Allergy**

---

**Which SHELLFISH caused the most recent allergic reaction?**

---

Abalone  
Barnacle  
Clam  
Crab  
Crayfish  
Cockle  
Cuttlefish  
Krill  
Limpet  
Lobster  
Mussel  
Octopus  
Oyster  
Periwinkle  
Prawn  
Sea cucumber  
Sea urchin  
Scallop  
Squid (calamari)  
Shrimp  
Snail (escargot)  
Other SHELLFISH (please specify)

---

## **Fish Allergy**

---

**Which FINNED FISH caused the most recent allergic reaction?**

---

---

Anchovy  
Bass  
Catfish  
Cod  
Eel  
Flounder  
Haddock  
Hake  
Halibut  
Herring  
Mackerel  
Megrin  
Perch  
Plaice  
Pollock  
Salmon  
Sardine  
Snapper  
Swordfish  
Tilapia  
Trout  
Tuna  
Whitefish  
Other FINNED FISH (please specify)

---

## **Sesame Allergy**

---

**In what form was SESAME ingested?**

---

Cooked  
Raw  
Sesame butter (Tahini)  
Sesame flour  
Sesame oil  
Sesame seed  
Unsure

---

## **Bean, Legumes, or Pulses Allergy**

---

**Which BEAN, LEGUME, or PULSE caused the most recent allergic reaction?**

---

Black bean  
Carob  
Chickpea  
Green bean  
Lentil  
Lima bean  
Lupin  
Navy bean  
Red kidney bean  
Pea  
Pinto bean  
Other BEANS, LEGUMES or, PULSES (please specify)

---

## **Cereal or Grain Allergy**

---

**Which CEREAL or GRAIN caused the most recent allergic reaction?**

---

Barley  
Buckwheat  
Corn  
Malt  
Millet  
Oat  
Rapeseed or canola  
Rice  
Rye  
Spelt  
Wheat  
Other CEREALS or GRAINS (please specify)

---

## **Fruit Allergy**

---

**Which FRUIT caused the most recent allergic reaction?**

---

Apple  
Apricot  
Avocado  
Banana  
Blackberry  
Blueberry  
Cantaloupe



---

Carambola or starfruit  
Cherry  
Coconut  
Cranberry  
Currant  
Date  
Fig  
Grape  
Grapefruit  
Guava  
Jackfruit  
Kiwifruit  
Lemon  
Lime  
Mandarin  
Mango  
Melon  
Nectarine  
Olive  
Orange  
Papaya  
Passion-fruit  
Peach  
Pear  
Persimmon  
Pineapple  
Plum  
Raspberry  
Strawberry  
Watermelon  
Other FRUITS (please specify)

---

## **Herb or Spice Allergy**

---

**Which HERB or SPICE caused the most recent allergic reaction?**

---

Aniseed  
Basil  
Bay leaf  
Black pepper  
Chamomile  
Caraway

---

Cardamom  
Cayenne  
Cinnamon  
Clove  
Coriander  
Cumin  
Curry  
Dandelion  
Echinacea  
Fennel  
Fenugreek  
Garlic  
Ginger  
Hibiscus  
Hops  
Nutmeg  
Oregano  
Paprika  
Parsley  
Peppermint  
Saffron  
Sage  
Spearmint  
Turmeric  
Vanilla  
Other HERBS or SPICES (please specify)

---

## **Meat Allergy**

---

**Which MEAT caused the most recent allergic reaction?**

---

Beef  
Chicken  
Duck  
Elk or moose  
Gelatin  
Horse  
Lamb  
Pork  
Rabbit  
Turkey

---

Venison  
Other MEAT PRODUCTS (please specify)

---

## **Non-food Items**

---

**Which NON-FOOD ITEM caused the most recent allergic reaction?**

---

Cosmetics  
Craft supplies  
Dental products  
Prescription medication  
Non-prescription medicine  
Pet food  
Vaccine  
Other NON-FOOD ITEM (please specify)

---

## **Seed Allergy**

---

**Which SEED caused the most recent allergic reaction?**

---

Chocolate (cacao seed)  
Flaxseed  
Fennel seed  
Sunflower  
Poppy  
Pumpkin  
Other SEEDS (please specify)

---

## **Vegetable Allergy**

---

**Which VEGETABLE caused the most recent allergic reaction?**

---

Artichoke  
Asparagus  
Bamboo shoot  
Beet  
Bell pepper  
Broccoli  
Brussels sprout  
Cabbage  
Carrot

---

Cauliflower  
Celery  
Cucumber  
Eggplant  
Lettuce  
Mushroom  
Onion  
Pepper  
Potato, sweet  
Potato, white  
Spinach  
Squash or pumpkin  
Tomato  
Zucchini  
Other VEGETABLES (please specify)

---

## Exposure History 2

---

**Was a manufactured, processed, or pre-packaged food product ingested?**

---

Yes  
No  
Unsure

---

**How much of the allergenic food did the participant consume?**

---

Participant did not consume allergen  
Contact with lip/mouth without swallowing  
One mouthful  
Half of the meal  
The entire meal  
Unsure

---

## Food Label

---

**Did the participant or caretaker read the food label and ingredient list?**

---

Yes  
No  
Not labeled  
Unsure

---

## Exposure History 3

---

**By what route was the participant exposed to the allergen?**

---

Injection (shot)  
Ingestion (eating, licking)  
Inhalation (breathing)  
Skin contact (touching)  
Unsure

---

**Has the participant been exposed to this allergen previously?**

---

Yes  
No  
Unsure

---

**Was any information available that indicated the participant could be exposed to the allergen?  
(Select all that apply.)**

---

No  
Did not look  
I chose not to ask  
Allergen not mentioned in the ingredient list  
Allergen not mentioned in the precautionary allergen statement  
Information provided by friends  
Information provided by staff verbally  
Label listed allergen as ingredient  
Menu - allergen listed in menu  
Precautionary allergen statement (e.g. may contain)  
Unsure  
Other (please specify)

---

**Where did the participant's exposure to the allergen occur?**

---

Airplane/in-flight  
Camp  
Commuting/in transit (bike/bus/car/train/on foot)  
Day care  
Dining out  
Field/park/recreation area  
Friend's/Relative's house

---

Gym  
Home  
Hospital  
School  
Work  
Unsure  
Other

---

**If you selected "Other" in the previous question, please enter where the exposure occurred in the space provided:**

---

**Please list any food or non-food item the participant came into contact with that contributed to the most recent allergic reaction (e.g., pizza, sandwich, ice cream, medication)**

---

---

## **Dining Out**

---

**If the participant was exposed while dining out, what type of establishment was visited?**

---

Asian restaurant  
Bakery  
Bar  
Buffet  
Cafe  
Concert  
Fast food restaurant  
Hotel  
Ice cream parlor  
Movies  
Sports arena  
Theater  
Other establishment

---

**If the allergen exposure occurred while dining out, was the staff informed about the participant having a food allergy?**

---

Yes  
No  
Unsure

---

Was a list of ingredients, allergens, or a precautionary statement included in the menu?

---

Yes  
No  
Unsure

---

## Symptoms

---

What specific SKIN symptoms did the participant develop during the food allergy reaction? (Select all that apply.)

---

Dry skin  
Eczema/atopic dermatitis  
Hives (welts, urticaria)  
Itching  
Flushing  
Swelling (angioedema)  
Rash (redness of skin)  
Red, itchy or watery eyes  
Sweating  
None  
Unsure  
Other SKIN symptoms (please specify)

---

What specific GASTROINTESTINAL (digestive tract) symptoms did the participant develop during the food allergy reaction? (Select all that apply.)

---

Bloating  
Bloody stools  
Constipation  
Diarrhea  
Difficulty swallowing  
Itchy/tingling mouth/tongue/throat/ear canal  
Nausea  
Odd taste in mouth/metallic taste  
Reflux  
Stomach pain/cramps  
Swelling of mouth or tongue  
Throat tightness  
Vomiting  
None

---

Unsure  
Other GASTROINTESTINAL symptoms (please specify)

---

**What specific RESPIRATORY (lungs/breathing) symptoms did the participant develop during the food allergy reaction? (Select all that apply.)**

---

Chest tightening  
Hoarse voice  
Nasal congestion/stuffy or runny nose  
Sneezing  
Repetitive cough  
Trouble breathing (shortness of breath)  
Wheezing  
None  
Unsure  
Other RESPIRATORY symptoms (please specify)

---

**What specific CARDIOVASCULAR (Heart) symptoms did the participant develop during the food allergy reaction? (Select all that apply.)**

---

Cardiac arrest  
Chest pain  
Irregular heart rate  
Lightheadedness/dizziness  
Loss of consciousness/passed out  
Low blood pressure  
Rapid heartbeat (tachycardia)  
Slow heartbeat (bradycardia)  
Turning blue  
Weak pulse  
None  
Unsure  
Other CARDIOVASCULAR symptoms (please specify)

---

**What specific BEHAVIORAL/NEUROLOGIC symptoms did the participant develop during the food allergy reaction? (Select all that apply.)**

---

Anxiety  
Blurred vision  
Confusion  
Depression



---

Fatigue  
Headache  
Irritability  
Feeling of "impending doom"  
Panic  
Sleep disturbances  
Seizures  
Withdrawal from social and recreational activities  
None  
Unsure  
Other BEHAVIORAL/NEUROLOGIC symptoms (please specify)

---

**How soon after exposure to the allergen did symptoms begin?**

---

Immediately/while eating  
5 to 10 minutes  
11 to 30 minutes  
31 minutes to 1 hour  
2 hours  
3 hours  
More than 3 hours  
Unsure

---

**Did the participant experience a biphasic reaction?**

A second wave of symptoms one to four hours after initial symptoms subsided without repeated exposure to the allergen.

---

Yes  
No  
Unsure

---

## **Biphasic Reaction**

---

**How long after initial symptoms disappeared, did the second wave of symptoms begin?**

---

Less than 1 hour  
1 to 5 hours  
6 to 10 hours  
11 to 24 hours  
25 to 48 hours

---

49 to 72 hours  
More than 72 hours

---

**Compared to the initial reaction, how severe do you feel was the participant's second wave of symptoms?**

---

Mild  
Moderate  
Severe  
Very Severe  
Unsure

---

## **Treatment**

---

**What treatment was administered to manage the allergic reaction?**

---

Resolved without treatment  
Atropine  
Bronchodilator (albuterol inhaler)  
Epinephrine auto-injector  
Epinephrine (intravenous or IV)  
Glucagon  
Intravenous (IV) fluids  
Oral corticosteroids (prednisone, methylprednisolone)  
Oxygen therapy  
Type 1 antihistamines (Benadryl, Zyrtec, Claritin, Allegra)  
Type 2 antihistamines (Axid, Pepcid, Tagamet, Tazac, Zantac)  
Topical corticosteroids (hydrocortisone, triamcinolone)  
Unsure  
Other medication

---

**If you selected "Other medication" above, please enter the medication in the space provided:**

---

**Where or from whom did the participant receive help during the allergic reaction? (Select all that apply.)**

---

911/ambulance  
Admitted to the hospital  
Admitted to the Intensive Care Unit (ICU)

---

Allergist  
Family/friends  
General practitioner  
Pharmacy  
Visited emergency room  
Visited urgent care facility  
Did not seek help

---

**How many epinephrine auto-injectors does the participant carry at all times?**

---

0  
1  
2  
3  
More than 3  
Unsure

---

## **Epinephrine Use**

---

**After the allergic reaction started, how much time elapsed before epinephrine was administered?**

---

Immediately  
Less than 30 minutes  
30 to 60 minutes  
1 to 2 hours  
2 to 4 hours  
4 to 6 hours  
6 or more hours  
Unsure

---

**How many doses of epinephrine (auto-injectors) were used to treat the initial food allergy reaction?**

---

1  
2  
3  
More than 3  
Unsure

---

**Which brand of epinephrine auto-injector did the participant use? (Select all that apply.)**

---

---

Adrenaclick  
Adrenalina WZF  
Altellus  
Anapen  
Auvi-Q  
Emerade  
EpiPen  
Fastjekt  
Fastpen  
Generic  
Impax  
Jext  
Symjepi  
Unsure

---

## **Other**

---

**How did the participant feel after experiencing this allergic reaction? (Select all that apply.)**

---

Anxious  
Concerned  
Confident  
Depressed  
Embarrassed  
Frustrated  
Hopeless  
Indifferent  
Scared  
Unwell  
Upset  
Worried

---

**What steps does the participant plan to take to avoid future exposures and reactions? (Select all that apply.)**

---

Always carry at least 2 epinephrine auto-injectors  
Avoid cross-contact  
Avoid foods from bulk bins  
Avoid foods when unsure about composition and safety  
Avoid high-risk situations (buffets, picnics, etc.)  
Avoid non-accidental (intentional) exposure

---

Avoid products with precautionary allergen labeling (PAL)  
Carry a chef card  
Carry a Food Allergy & Anaphylaxis Emergency Care Plan  
Constant vigilance  
Do not buy foods without an ingredient list  
Educate all caretakers  
Perform a Triple Check by reading the label 3 times: before buying, before putting away, before serving  
Prepare more meals at home  
Read food labels each time a product is purchased  
Strict allergen avoidance  
Wear medical identification bracelet  
Unsure  
Other (please specify)

---

**Does the participant have additional comments about this food allergy reaction?**
