# Supplementary material
Source: PubMed Central journal article supplement (PMC10164686)
Supplement: NIHMS1877950-supplement-5.pdf [file NIHMS1877950-supplement-5.pdf]

1 *Supplemental Figure Legends*

2  
3 **Figure E1. Distributions of ages of participants at time of survey by +EoE and -EoE**  
4 **subsets.** The median age of participants in the +EoE subset was 15 years and 182 (58.9%) were  
5 18 years or younger at the time of the survey. The median age for participants in the -EoE subset  
6 was 13 years with 3600 (62.4%) being 18 years or younger at the time of the survey.

7  
8  
9 **Figure E2. Analysis of participant sex based on “Who is completing this survey?” response**  
10 **by +EoE or -EoE subset. (a)** Participants whose data was reported by non-self respondents. **(b)**  
11 Participants whose data was self-reported. N=6,064; 10 participants in the -EoE subset were  
12 removed due to lack of response. There was no significant difference in the percentage of  
13 participants with EoE between the self-reporting (5.86% +EoE) and non-self-reporting (5.04%  
14 +EoE) subsets (P-value: 0.2093). P-values obtained by Fisher’s exact test.  
15

Journal Pre-proof

Supplemental Tables

1

2 **Table E1. Adjusted<sup>1</sup> odds of co-existing eosinophilic esophagitis for food allergic registry**  
 3 **participants with specific food allergies**

| <i>Food Allergens<sup>2</sup></i> | <i>-EoE</i><br><i>n=5765</i> | <i>+EoE</i><br><i>n=309</i> | <i>Adjusted OR</i><br><i>(95% CI)</i> | <i>FDR-adjusted</i><br><i>P value</i> |
|-----------------------------------|------------------------------|-----------------------------|---------------------------------------|---------------------------------------|
| <b>Beans/Legumes/Peas</b>         | <b>688 (12%)</b>             | <b>71 (23%)</b>             | <b>2.2 (1.67, 2.91)</b>               | <b>2.0e-07</b>                        |
| <i>Black beans</i>                | 174 (3%)                     | 29 (9%)                     | 3.3 (2.18, 4.99)                      | 1.4e-07                               |
| <i>Chickpea</i>                   | 403 (7%)                     | 33 (11%)                    | 1.6 (1.09, 2.31)                      | 0.027                                 |
| <i>Green beans</i>                | 189 (3%)                     | 22 (7%)                     | 2.2 (1.41, 3.53)                      | 0.0015                                |
| <i>Lentils</i>                    | 356 (6%)                     | 38 (12%)                    | 2.1 (1.49, 3.04)                      | 1.3e-04                               |
| <i>Lima beans</i>                 | 195 (3%)                     | 25 (8%)                     | 2.5 (1.61, 3.86)                      | 1.4e-04                               |
| <i>Navy beans</i>                 | 189 (3%)                     | 22 (7%)                     | 2.3 (1.42, 3.56)                      | 0.0014                                |
| <i>Red kidney beans</i>           | 176 (3%)                     | 27 (9%)                     | 3.0 (1.95, 4.56)                      | 2.8e-06                               |
| <i>Peas</i>                       | 439 (8%)                     | 55 (18%)                    | 2.6 (1.93, 3.57)                      | 1.1e-08                               |
| <i>Pinto beans</i>                | 179 (3%)                     | 30 (10%)                    | 3.3 (2.19, 4.95)                      | 1.1e-07                               |
| <i>Other bean/pea</i>             | 88 (2%)                      | 7 (2%)                      | 1.6 (0.71, 3.39)                      | 0.31                                  |
| <b>Cereals/Grains</b>             | <b>416 (7%)</b>              | <b>56 (18%)</b>             | <b>3.0 (2.17, 4.07)</b>               | <b>2.0e-10</b>                        |
| <i>Barley</i>                     | 195 (3%)                     | 28 (9%)                     | 3.0 (1.94, 4.51)                      | 2.8e-06                               |
| <i>Buckwheat</i>                  | 86 (1%)                      | 17 (6%)                     | 3.9 (2.29, 6.78)                      | 4.1e-06                               |
| <i>Corn</i>                       | 169 (3%)                     | 22 (7%)                     | 2.6 (1.62, 4.14)                      | 2.3e-04                               |
| <i>Gluten</i>                     | 156 (3%)                     | 22 (7%)                     | 2.9 (1.80, 4.63)                      | 4.3e-05                               |
| <i>Hops</i>                       | 71 (1%)                      | 8 (3%)                      | 2.2 (1.03, 4.65)                      | 0.060                                 |
| <i>Malt</i>                       | 97 (2%)                      | 13 (4%)                     | 2.7 (1.46, 4.88)                      | 0.0031                                |
| <i>Millet</i>                     | 54 (1%)                      | 10 (3%)                     | 3.9 (1.93, 7.79)                      | 4.3e-04                               |
| <i>Oat</i>                        | 185 (3%)                     | 25 (8%)                     | 2.7 (1.77, 4.25)                      | 2.9e-05                               |
| <i>Rapeseed</i>                   | 19 (<1%)                     | 5 (2%)                      | 5.2 (1.90, 14.08)                     | 0.0029                                |
| <i>Rice</i>                       | 73 (1%)                      | 16 (5%)                     | 4.2 (2.42, 7.39)                      | 2.5e-06                               |
| <i>Rye</i>                        | 154 (3%)                     | 17 (6%)                     | 2.1 (1.27, 3.62)                      | 0.0082                                |
| <i>Spelt</i>                      | 65 (1%)                      | 16 (5%)                     | 5.1 (2.88, 9.06)                      | 2.0e-07                               |
| <i>Wheat</i>                      | 279 (5%)                     | 44 (14%)                    | 3.4 (2.40, 4.81)                      | 9.5e-11                               |
| <i>Other cereal/grain</i>         | 38 (1%)                      | 4 (1%)                      | 2.1 (0.73, 5.89)                      | 0.21                                  |
| <b>Egg</b>                        | <b>2405 (42%)</b>            | <b>189 (61%)</b>            | <b>2.5 (1.91, 3.15)</b>               | <b>3.7e-11</b>                        |
| <b>Finned Fish</b>                | <b>530 (9%)</b>              | <b>70 (23%)</b>             | <b>3.0 (2.23, 3.95)</b>               | <b>2.2e-12</b>                        |
| <i>Anchovies</i>                  | 188 (3%)                     | 17 (6%)                     | 1.8 (1.04, 2.93)                      | 0.051                                 |
| <i>Bass</i>                       | 177 (3%)                     | 15 (5%)                     | 1.6 (0.94, 2.80)                      | 0.11                                  |
| <i>Catfish</i>                    | 193 (3%)                     | 16 (5%)                     | 1.6 (0.93, 2.69)                      | 0.12                                  |
| <i>Cod</i>                        | 284 (5%)                     | 33 (11%)                    | 2.3 (1.58, 3.40)                      | 7.6e-05                               |
| <i>Eel</i>                        | 139 (2%)                     | 12 (4%)                     | 1.7 (0.90, 3.02)                      | 0.14                                  |
| <i>Flounder</i>                   | 196 (3%)                     | 15 (5%)                     | 1.5 (0.84, 2.49)                      | 0.21                                  |
| <i>Haddock</i>                    | 177 (3%)                     | 19 (6%)                     | 2.1 (1.26, 3.38)                      | 0.0076                                |
| <i>Hake</i>                       | 145 (3%)                     | 11 (4%)                     | 1.4 (0.76, 2.69)                      | 0.30                                  |
| <i>Halibut</i>                    | 198 (3%)                     | 20 (6%)                     | 2.0 (1.21, 3.17)                      | 0.011                                 |
| <i>Herring</i>                    | 159 (3%)                     | 13 (4%)                     | 1.6 (0.86, 2.77)                      | 0.18                                  |
| <i>Mackerel</i>                   | 169 (3%)                     | 12 (4%)                     | 1.4 (0.75, 2.49)                      | 0.35                                  |
| <i>Megrim</i>                     | 136 (2%)                     | 11 (4%)                     | 1.5 (0.82, 2.90)                      | 0.21                                  |
| <i>Perch</i>                      | 165 (3%)                     | 13 (4%)                     | 1.5 (0.82, 2.64)                      | 0.22                                  |
| <i>Plaice</i>                     | 136 (2%)                     | 11 (4%)                     | 1.5 (0.82, 2.89)                      | 0.21                                  |
| <i>Pollock</i>                    | 165 (3%)                     | 14 (5%)                     | 1.6 (0.91, 2.82)                      | 0.13                                  |
| <i>Salmon</i>                     | 304 (5%)                     | 36 (12%)                    | 2.5 (1.70, 3.57)                      | 8.8e-06                               |
| <i>Sardine</i>                    | 169 (3%)                     | 11 (4%)                     | 1.3 (0.67, 2.33)                      | 0.52                                  |
| <i>Snapper</i>                    | 157 (3%)                     | 13 (4%)                     | 1.6 (0.89, 2.84)                      | 0.16                                  |
| <i>Swordfish</i>                  | 157 (3%)                     | 11 (4%)                     | 1.3 (0.70, 2.47)                      | 0.43                                  |
| <i>Tilapia</i>                    | 202 (4%)                     | 21 (7%)                     | 2.1 (1.30, 3.33)                      | 0.0046                                |
| <i>Trout</i>                      | 193 (3%)                     | 15 (5%)                     | 1.5 (0.88, 2.60)                      | 0.18                                  |
| <i>Tuna</i>                       | 273 (5%)                     | 33 (11%)                    | 2.5 (1.68, 3.64)                      | 2.0e-05                               |
| <i>Whitefish</i>                  | 196 (3%)                     | 22 (7%)                     | 2.2 (1.39, 3.50)                      | 0.0019                                |
| <i>Other finned fish</i>          | 77 (1%)                      | 9 (3%)                      | 2.2 (1.06, 4.34)                      | 0.050                                 |
| <b>Fruit</b>                      | <b>970 (17%)</b>             | <b>80 (26%)</b>             | <b>1.8 (1.36, 2.34)</b>               | <b>1.2e-04</b>                        |
| <i>Apple</i>                      | 246 (4%)                     | 32 (10%)                    | 2.7 (1.79, 3.98)                      | 7.2e-06                               |
| <i>Apricot</i>                    | 116 (2%)                     | 13 (4%)                     | 2.1 (1.18, 3.87)                      | 0.020                                 |
| <i>Avocado</i>                    | 222 (4%)                     | 25 (8%)                     | 2.2 (1.45, 3.48)                      | 8.8e-04                               |
| <i>Banana</i>                     | 296 (5%)                     | 28 (9%)                     | 1.8 (1.22, 2.78)                      | 0.0075                                |
| <i>Blackberry</i>                 | 66 (1%)                      | 8 (3%)                      | 2.3 (1.11, 4.96)                      | 0.041                                 |
| <i>Blueberry</i>                  | 80 (1%)                      | 11 (4%)                     | 2.7 (1.41, 5.17)                      | 0.0057                                |
| <i>Carambola</i>                  | 14 (<1%)                     | 4 (1%)                      | 5.4 (1.74, 16.48)                     | 0.0070                                |

|                        |                   |                  |                         |                |
|------------------------|-------------------|------------------|-------------------------|----------------|
| <i>Cherry</i>          | 145 (3%)          | 14 (5%)          | 1.9 (1.06, 3.30)        | 0.049          |
| <i>Coconut</i>         | 152 (3%)          | 18 (6%)          | 2.4 (1.42, 3.94)        | 0.0021         |
| <i>Cranberry</i>       | 40 (1%)           | 6 (2%)           | 2.9 (1.20, 6.94)        | 0.028          |
| <i>Currant</i>         | 19 (<1%)          | 5 (2%)           | 4.8 (1.78, 13.10)       | 0.0042         |
| <i>Date</i>            | 47 (1%)           | 5 (2%)           | 2.0 (0.79, 5.12)        | 0.18           |
| <i>Grape</i>           | 68 (1%)           | 19 (6%)          | 5.5 (3.21, 9.26)        | 4.4e-09        |
| <i>Grapefruit</i>      | 89 (2%)           | 8 (3%)           | 1.7 (0.80, 3.53)        | 0.21           |
| <i>Guava</i>           | 43 (1%)           | 6 (2%)           | 2.6 (1.10, 6.30)        | 0.046          |
| <i>Kiwifruit</i>       | 226 (4%)          | 27 (9%)          | 2.4 (1.57, 3.66)        | 1.8e-04        |
| <i>Lemon</i>           | 78 (1%)           | 5 (2%)           | 1.2 (0.46, 2.91)        | 0.76           |
| <i>Lime</i>            | 60 (1%)           | 5 (2%)           | 1.5 (0.59, 3.77)        | 0.43           |
| <i>Mandarin</i>        | 63 (1%)           | 6 (2%)           | 1.8 (0.77, 4.23)        | 0.21           |
| <i>Mango</i>           | 186 (3%)          | 22 (7%)          | 2.3 (1.46, 3.71)        | 0.0010         |
| <i>Melon</i>           | 214 (4%)          | 25 (8%)          | 2.4 (1.51, 3.66)        | 4.5e-04        |
| <i>Orange</i>          | 167 (3%)          | 12 (4%)          | 1.4 (0.74, 2.50)        | 0.35           |
| <i>Papaya</i>          | 75 (1%)           | 8 (3%)           | 2.0 (0.95, 4.27)        | 0.094          |
| <i>Passion fruit</i>   | 54 (1%)           | 7 (2%)           | 2.5 (1.10, 5.54)        | 0.044          |
| <i>Peach</i>           | 211 (4%)          | 24 (8%)          | 2.3 (1.45, 3.54)        | 9.2e-04        |
| <i>Pear</i>            | 127 (2%)          | 16 (5%)          | 2.5 (1.43, 4.22)        | 0.0028         |
| <i>Persimmon</i>       | 30 (1%)           | 4 (1%)           | 2.6 (0.88, 7.35)        | 0.12           |
| <i>Pineapple</i>       | 181 (3%)          | 15 (5%)          | 1.6 (0.90, 2.69)        | 0.14           |
| <i>Plum</i>            | 112 (2%)          | 13 (4%)          | 2.3 (1.27, 4.17)        | 0.011          |
| <i>Raspberry</i>       | 83 (1%)           | 9 (3%)           | 2.1 (1.03, 4.24)        | 0.059          |
| <i>Strawberry</i>      | 235 (4%)          | 24 (8%)          | 2.0 (1.29, 3.14)        | 0.0042         |
| <i>Watermelon</i>      | 196 (3%)          | 24 (8%)          | 2.4 (1.56, 3.81)        | 3.0e-04        |
| <i>Other fruit</i>     | 118 (2%)          | 9 (3%)           | 1.4 (0.72, 2.87)        | 0.35           |
| <b>Meat</b>            | <b>412 (7%)</b>   | <b>60 (19%)</b>  | <b>3.1 (2.30, 4.26)</b> | <b>8.2e-12</b> |
| <i>Beef</i>            | 293 (5%)          | 41 (13%)         | 2.8 (1.95, 3.98)        | 1.6e-07        |
| <i>Chicken</i>         | 106 (2%)          | 33 (11%)         | 6.3 (4.13, 9.46)        | 3.1e-16        |
| <i>Duck</i>            | 27 (<1%)          | 5 (2%)           | 3.6 (1.37, 9.53)        | 0.016          |
| <i>Elk/Moose</i>       | 72 (1%)           | 5 (2%)           | 1.2 (0.47, 3.06)        | 0.71           |
| <i>Gelatin</i>         | 88 (2%)           | 7 (2%)           | 1.4 (0.64, 3.13)        | 0.43           |
| <i>Horse</i>           | 65 (1%)           | 6 (2%)           | 1.6 (0.68, 3.84)        | 0.31           |
| <i>Lamb</i>            | 144 (2%)          | 13 (4%)          | 1.7 (0.91, 2.98)        | 0.13           |
| <i>Pork</i>            | 179 (3%)          | 31 (10%)         | 3.5 (2.32, 5.32)        | 2.9e-08        |
| <i>Rabbit</i>          | 61 (1%)           | 5 (2%)           | 1.4 (0.57, 3.67)        | 0.47           |
| <i>Turkey</i>          | 60 (1%)           | 23 (7%)          | 7.5 (4.53, 12.33)       | 1.8e-13        |
| <i>Venison</i>         | 84 (1%)           | 5 (2%)           | 1.0 (0.41, 2.61)        | 0.94           |
| <b>Milk</b>            | <b>2027 (35%)</b> | <b>189 (61%)</b> | <b>3.0 (2.36 3.80)</b>  | <b>2.0e-17</b> |
| <b>Peanut</b>          | <b>3736 (65%)</b> | <b>207 (67%)</b> | <b>1.1 (0.87, 1.47)</b> | <b>0.38</b>    |
| <b>Seeds</b>           | <b>1106 (19%)</b> | <b>89 (29%)</b>  | <b>1.7 (1.32, 2.20)</b> | <b>1.6e-04</b> |
| <i>Fennel seed</i>     | 54 (1%)           | 6 (2%)           | 2.2 (0.91, 5.06)        | 0.11           |
| <i>Flaxseed</i>        | 119 (2%)          | 20 (6%)          | 3.3 (2.03, 5.42)        | 8.8e-06        |
| <i>Mustard seed</i>    | 182 (3%)          | 20 (6%)          | 2.1 (1.33, 3.46)        | 0.0039         |
| <i>Poppy seed</i>      | 103 (2%)          | 14 (5%)          | 2.6 (1.45, 4.56)        | 0.0029         |
| <i>Pumpkin seed</i>    | 91 (2%)           | 14 (5%)          | 3.0 (1.70, 5.41)        | 5.3e-04        |
| <i>Sesame seed</i>     | 911 (16%)         | 77 (25%)         | 1.8 (1.35, 2.31)        | 1.3e-04        |
| <i>Sunflower seed</i>  | 298 (5%)          | 36 (12%)         | 2.4 (1.67, 3.50)        | 1.2e-05        |
| <i>Other seed</i>      | 63 (1%)           | 4 (1%)           | 1.2 (0.43, 3.31)        | 0.75           |
| <b>Shellfish</b>       | <b>1128 (20%)</b> | <b>105 (34%)</b> | <b>2.2 (1.74, 2.89)</b> | <b>4.4e-09</b> |
| <i>Clam</i>            | 493 (9%)          | 38 (12%)         | 1.6 (1.08, 2.21)        | 0.028          |
| <i>Crab</i>            | 696 (12%)         | 60 (19%)         | 1.8 (1.36, 2.48)        | 2.3e-04        |
| <i>Crayfish</i>        | 397 (7%)          | 28 (9%)          | 1.4 (0.92, 2.09)        | 0.14           |
| <i>Lobster</i>         | 663 (12%)         | 63 (20%)         | 2.1 (1.53, 2.76)        | 9.1e-06        |
| <i>Octopus</i>         | 282 (5%)          | 17 (6%)          | 1.2 (0.70, 1.93)        | 0.59           |
| <i>Oyster</i>          | 455 (8%)          | 31 (10%)         | 1.3 (0.90, 1.97)        | 0.19           |
| <i>Scallop</i>         | 478 (8%)          | 39 (13%)         | 1.6 (1.15, 2.34)        | 0.012          |
| <i>Squid</i>           | 307 (5%)          | 17 (6%)          | 1.1 (0.64, 1.77)        | 0.81           |
| <i>Shrimp</i>          | 866 (15%)         | 73 (24%)         | 1.8 (1.39, 2.44)        | 8.2e-05        |
| <i>Other shellfish</i> | 133 (2%)          | 15 (5%)          | 2.1 (1.24, 3.72)        | 0.012          |
| <b>Soy</b>             | <b>1095 (19%)</b> | <b>115 (37%)</b> | <b>2.6 (2.03, 3.28)</b> | <b>5.8e-13</b> |
| <b>Tree Nuts</b>       | <b>3414 (59%)</b> | <b>206 (67%)</b> | <b>1.4 (1.09, 1.79)</b> | <b>0.016</b>   |
| <i>Almond</i>          | 2175 (38%)        | 147 (48%)        | 1.5 (1.20, 1.90)        | 0.0013         |
| <i>Brazil nut</i>      | 1795 (31%)        | 113 (37%)        | 1.3 (1.01, 1.62)        | 0.066          |
| <i>Cashew</i>          | 2585 (45%)        | 148 (48%)        | 1.1 (0.90, 1.45)        | 0.30           |
| <i>Chestnut</i>        | 1225 (21%)        | 96 (31%)         | 1.7 (1.30, 2.14)        | 1.9e-04        |
| <i>Coconut</i>         | 546 (9%)          | 42 (14%)         | 1.5 (1.09, 2.15)        | 0.023          |
| <i>Hazelnut</i>        | 2193 (38%)        | 140 (45%)        | 1.4 (1.07, 1.70)        | 0.019          |

|                           |                   |                  |                         |                |
|---------------------------|-------------------|------------------|-------------------------|----------------|
| <i>Macadamia nut</i>      | 1648 (29%)        | 117 (38%)        | 1.5 (1.20, 1.94)        | 0.0013         |
| <i>Pecan</i>              | 2091 (36%)        | 132 (43%)        | 1.3 (1.04, 1.66)        | 0.035          |
| <i>Pine nut</i>           | 1332 (23%)        | 108 (35%)        | 1.8 (1.41, 2.29)        | 1.1e-05        |
| <i>Pistachio</i>          | 2285 (40%)        | 141 (46%)        | 1.3 (1.03, 1.64)        | 0.045          |
| <i>Walnut</i>             | 2381 (41%)        | 152 (49%)        | 1.4 (1.10, 1.74)        | 0.011          |
| <i>Other tree nut</i>     | 157 (3%)          | 9 (3%)           | 1.1 (0.53, 2.08)        | 0.90           |
| <b>Vegetables</b>         | <b>586 (10%)</b>  | <b>66 (21%)</b>  | <b>2.5 (1.87, 3.40)</b> | <b>1.6e-08</b> |
| <i>Asparagus</i>          | 37 (1%)           | 6 (2%)           | 3.1 (1.29, 7.48)        | 0.020          |
| <i>Broccoli</i>           | 62 (1%)           | 6 (2%)           | 1.8 (0.78, 4.28)        | 0.21           |
| <i>Brussel sprouts</i>    | 38 (1%)           | 3 (1%)           | 1.5 (0.45, 4.84)        | 0.55           |
| <i>Cabbage</i>            | 50 (1%)           | 5 (2%)           | 1.9 (0.75, 4.90)        | 0.21           |
| <i>Carrot</i>             | 148 (3%)          | 19 (6%)          | 2.5 (1.50, 4.08)        | 0.0010         |
| <i>Cauliflower</i>        | 46 (1%)           | 6 (2%)           | 2.4 (1.01, 5.74)        | 0.066          |
| <i>Celery</i>             | 110 (2%)          | 16 (5%)          | 2.8 (1.64, 4.92)        | 5.5e-04        |
| <i>Cucumber</i>           | 87 (2%)           | 13 (4%)          | 2.9 (1.61, 5.37)        | 0.0012         |
| <i>Eggplant</i>           | 78 (1%)           | 6 (2%)           | 1.4 (0.60, 3.30)        | 0.46           |
| <i>Lettuce</i>            | 45 (1%)           | 13 (4%)          | 5.9 (3.10, 11.16)       | 4.5e-07        |
| <i>Onion</i>              | 95 (2%)           | 12 (4%)          | 2.6 (1.37, 4.80)        | 0.0069         |
| <i>Parsley</i>            | 24 (<1%)          | 6 (2%)           | 4.9 (1.96, 12.09)       | 0.0016         |
| <i>Pepper</i>             | 90 (2%)           | 6 (2%)           | 1.2 (0.53, 2.88)        | 0.64           |
| <i>Sweet potato</i>       | 42 (1%)           | 12 (4%)          | 5.7 (2.95, 11.00)       | 1.5e-06        |
| <i>Spinach</i>            | 41 (1%)           | 7 (2%)           | 3.3 (1.47, 7.53)        | 0.0077         |
| <i>Pumpkin, squash</i>    | 73 (2%)           | 8 (3%)           | 2.1 (0.97, 4.33)        | 0.084          |
| <i>Tomato</i>             | 194 (3%)          | 25 (8%)          | 2.6 (1.68, 4.10)        | 9.6e-05        |
| <i>White potato</i>       | 91 (2%)           | 13 (4%)          | 2.8 (1.54, 5.17)        | 0.0018         |
| <i>Other vegetable</i>    | 187 (3%)          | 24 (8%)          | 2.6 (1.63, 3.99)        | 1.6e-04        |
| <b>Wheat</b>              | <b>962 (17%)</b>  | <b>102 (33%)</b> | <b>2.6 (2.01, 3.33)</b> | <b>3.4e-12</b> |
| <b>Other Food Allergy</b> | <b>1418 (25%)</b> | <b>117 (38%)</b> | <b>1.9 (1.51, 2.47)</b> | <b>1.1e-06</b> |

- 4 CI: confidence interval; EoE: eosinophilic esophagitis; FDR: false discovery rate; OR: odds ratio  
5 1. Adjusted for sex, age, race, ethnicity, and geographic location in multivariable logistic regression models.  
6 2. Excluded carob, jackfruit, olive, other meat, bamboo, Brussels sprouts, and beets due to <1% of participants reporting  
7 these comorbidities in both subsets.  
8  
9

10 **Table E2. Adjusted<sup>1</sup> odds of co-existing eosinophilic esophagitis based on reported**  
 11 **outgrown food allergies**

| <i>Outgrown Food Allergies</i>            | <i>-EoE</i><br><i>n=5765</i> | <i>+EoE</i><br><i>n=309</i> | <i>Adjusted OR</i><br><i>(95% CI)</i> | <i>FDR-adjusted</i><br><i>P Value</i> |
|-------------------------------------------|------------------------------|-----------------------------|---------------------------------------|---------------------------------------|
| <b><i>Any Food Allergies Outgrown</i></b> |                              |                             |                                       |                                       |
| Yes                                       | 1682 (29%)                   | 104 (34%)                   | 1.3 (0.99, 1.65)                      | 0.056 <sup>2</sup>                    |
| No                                        | 3448 (60%)                   | 167 (54%)                   |                                       |                                       |
| Unsure                                    | 635 (11%)                    | 38 (12%)                    |                                       |                                       |
| <b><i>Outgrown Food Allergens</i></b>     |                              |                             |                                       |                                       |
| Beans/legumes/peas                        | 113 (2%)                     | 14 (5%)                     | 2.5 (1.39, 4.35)                      | 0.026                                 |
| Cereals/grains                            | 81 (1%)                      | 6 (2%)                      | 1.4 (0.61, 3.26)                      | 0.86                                  |
| Egg                                       | 669 (12%)                    | 36 (12%)                    | 0.99 (0.69, 1.41)                     | 0.98                                  |
| Finned fish                               | 72 (1%)                      | 9 (3%)                      | 2.4 (1.17, 4.81)                      | 0.12                                  |
| Fruit                                     | 188 (3%)                     | 13 (4%)                     | 1.3 (0.72, 2.28)                      | 0.86                                  |
| Meat                                      | 85 (1%)                      | 15 (5%)                     | 3.4 (1.92, 5.95)                      | 6.0e-04                               |
| Milk                                      | 478 (8%)                     | 28 (9%)                     | 1.1 (0.73, 1.62)                      | 0.98                                  |
| Peanut                                    | 205 (4%)                     | 19 (6%)                     | 1.8 (1.08, 2.87)                      | 0.12                                  |
| Seeds                                     | 110 (2%)                     | 12 (4%)                     | 2.0 (1.10, 3.72)                      | 0.12                                  |
| Shellfish                                 | 109 (2%)                     | 9 (3%)                      | 1.5 (0.77, 3.08)                      | 0.57                                  |
| Soy                                       | 310 (5%)                     | 22 (7%)                     | 1.4 (0.87, 2.15)                      | 0.49                                  |
| <b><i>Tree nuts</i></b>                   |                              |                             |                                       |                                       |
| <i>Almond</i>                             | 622 (11%)                    | 33 (11%)                    | 0.98 (0.68, 1.43)                     | 0.98                                  |
| <i>Brazil nut</i>                         | 298 (5%)                     | 15 (5%)                     | 0.93 (0.55, 1.59)                     | 0.98                                  |
| <i>Cashew</i>                             | 343 (6%)                     | 18 (6%)                     | 0.98 (0.60, 1.60)                     | 0.98                                  |
| <i>Chestnut</i>                           | 270 (5%)                     | 13 (4%)                     | 0.89 (0.50, 1.57)                     | 0.98                                  |
| <i>Coconut</i>                            | 481 (8%)                     | 26 (8%)                     | 1.0 (0.66, 1.51)                      | 1.00                                  |
| <i>Hazelnut</i>                           | 395 (7%)                     | 18 (6%)                     | 0.85 (0.52, 1.39)                     | 0.95                                  |
| <i>Macadamia nut</i>                      | 302 (5%)                     | 15 (5%)                     | 0.92 (0.54, 1.56)                     | 0.98                                  |
| <i>Pecan</i>                              | 367 (6%)                     | 19 (6%)                     | 0.96 (0.60, 1.55)                     | 0.98                                  |
| <i>Pine nut</i>                           | 340 (6%)                     | 15 (5%)                     | 0.80 (0.47, 1.37)                     | 0.86                                  |
| <i>Pistachio</i>                          | 337 (6%)                     | 19 (6%)                     | 1.1 (0.66, 1.71)                      | 0.98                                  |
| <i>Walnut</i>                             | 381 (7%)                     | 18 (6%)                     | 0.88 (0.54, 1.43)                     | 0.98                                  |
| Vegetables                                | 89 (2%)                      | 9 (3%)                      | 2.0 (1.00, 4.03)                      | 0.19                                  |
| Wheat                                     | 219 (4%)                     | 18 (6%)                     | 1.6 (0.96, 2.60)                      | 0.23                                  |
| Other                                     | 346 (6%)                     | 10 (3%)                     | 0.51 (0.27, 0.96)                     | 0.16                                  |

12 CI: confidence interval; EoE: eosinophilic esophagitis; FDR: false discovery rate; OR: odds ratio  
 13 1. Adjusted for sex, age, race, ethnicity, and geographic location in multivariable logistic regression models.  
 14 2. “Yes” compared to “No” as reference. P value is not FDR-adjusted

15  
 16

## ONLINE REPOSITORY

1  
2  
3  
4  
5  
6  
7  
8  
9  
10  
11  
12  
13  
14  
15  
16  
17  
18  
19  
20  
21  
22  
23

### *Supplemental Methods*

#### *Food Allergy Research & Education (FARE) Patient Registry*

The FARE Patient Registry was developed for the purposes of conducting research on food allergy from self-reported data through an Institutional Review Board-approved study protocol (Advarra, Protocol Pro00022715). Registry participants voluntarily elect to enroll in the FARE Patient Registry via a link on the FARE website (<https://www.foodallergy.org>). Enrollees were required to be  $\geq 18$  years of age, though adult caregivers can enroll on behalf of children with food allergy and provide information pertaining to their child. Prior to enrollment completion, enrollees review information on the FARE Patient Registry and its objectives as a research study and voluntarily provide informed assent and/or consent for enrollment.

#### *Exclusions*

Participants with demographic information, but no additional survey questions completed (n=19) or no current age (n=11), were excluded. Additionally, participants were excluded if they had no apparent food allergy (n=35) – signified by selecting “None of the above” for the question, “*Has the participant ever been diagnosed by a doctor as allergic to any of the following foods or food groups?*” and/or not selecting any of the food allergen categories listed and also selecting “No” for “*Does the participant have any food allergies not listed above?*”.

#### *Statistical Analyses*

For the purposes of analysis, nominal age range values for ages <1 year and >80 years were converted to a representative numeric value. The option of “0 to 30 days old” was converted to

24 0.01, “1 to 3 months old” to 0.25, “4 to 7 months old” to 0.5, “8 to 11 months old” to 0.75, and  
25 “80 or more years old” to 80.

26 In the questionnaire section about symptoms that developed within 2 hours of eating the  
27 food or foods that produce an allergic reaction, the questions are grouped by main symptom  
28 categories (e.g. skin, respiratory), however, the respondents were not directly asked about any of  
29 the main category symptoms. To be able to study the association of symptoms of the main  
30 categories with co-existing EoE, we counted everyone who selected at least one of the specific  
31 symptoms or "Other" within one main symptom category as having a symptom of that main  
32 category.
