# Supplementary material
Source: PubMed Central journal article supplement (PMC10164686)

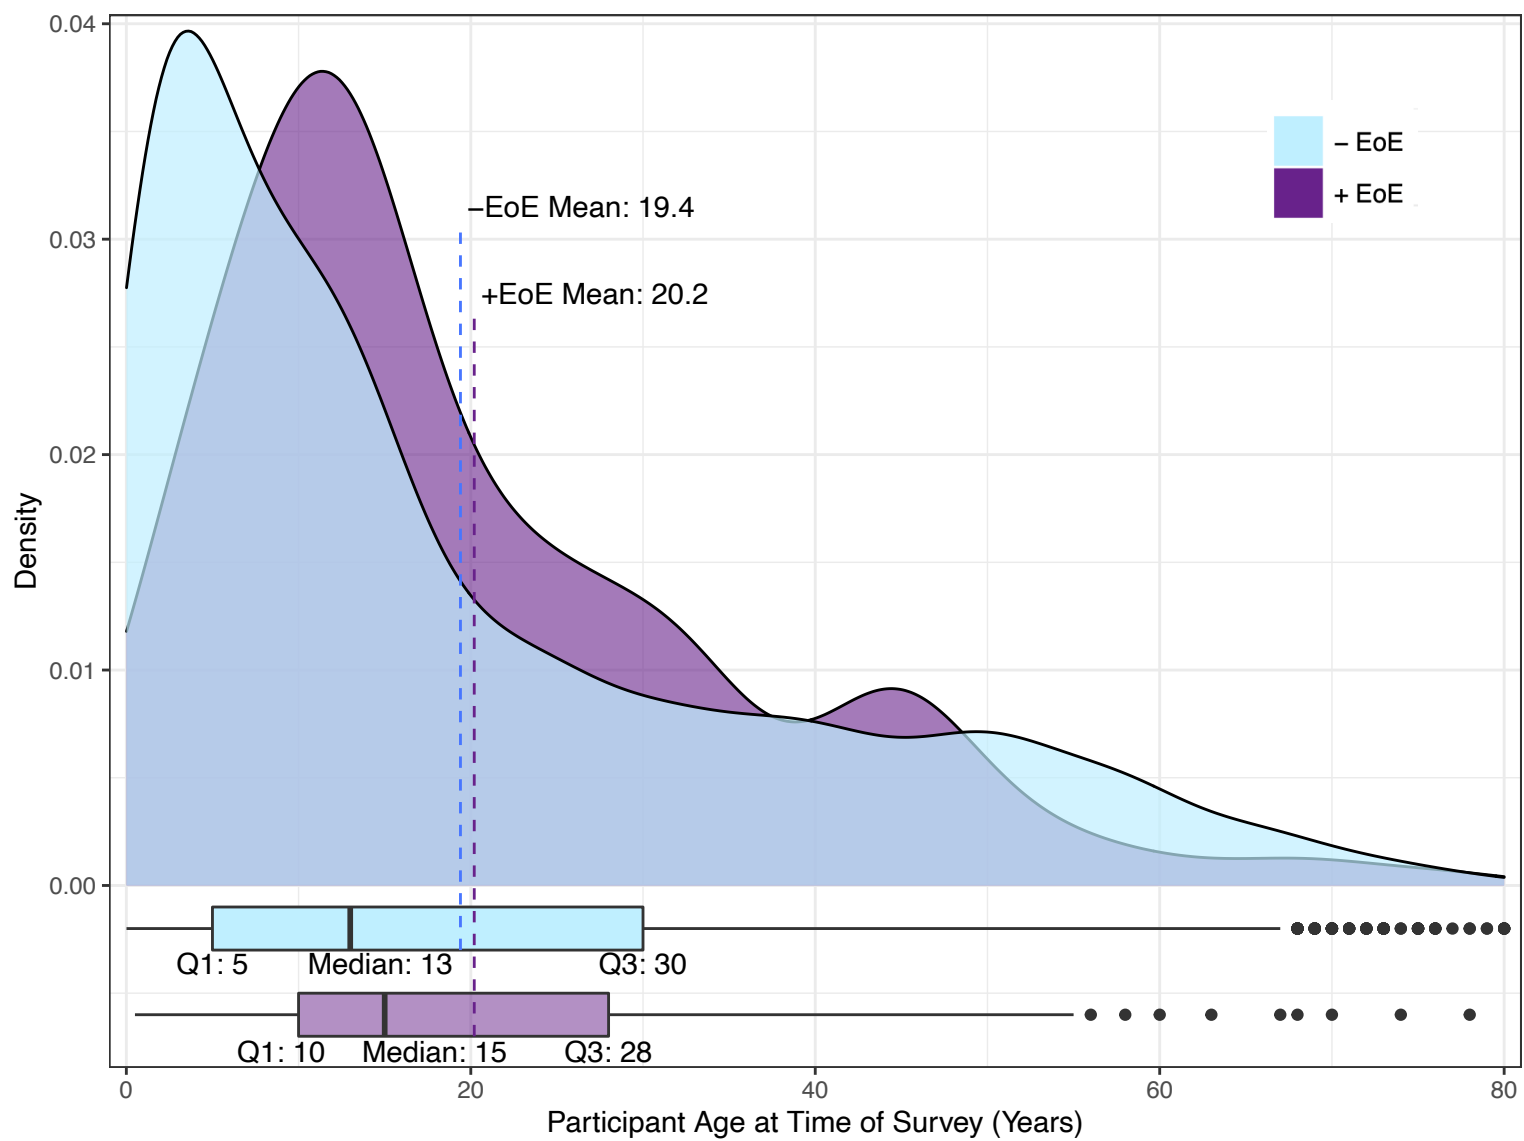

Supplement: NIHMS1877950-supplement-Fig_E1.pdf [file NIHMS1877950-supplement-Fig_E1.pdf]

Sex of Participant

a. Non-Self Responding  
P-Value = 0.026

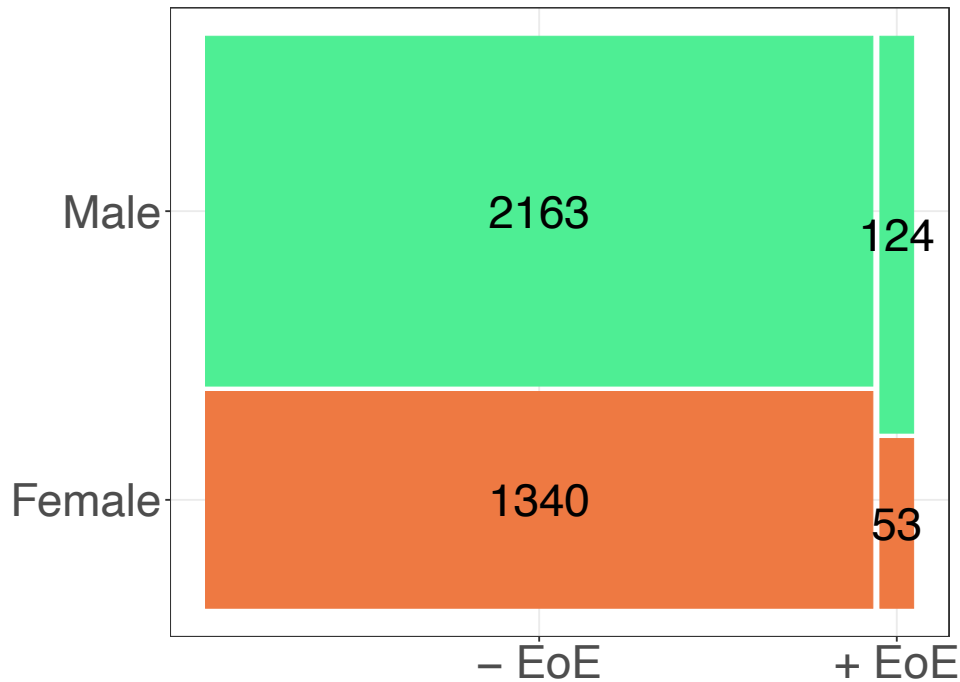

b. Participant (Self) Responding  
P-Value = 0.13

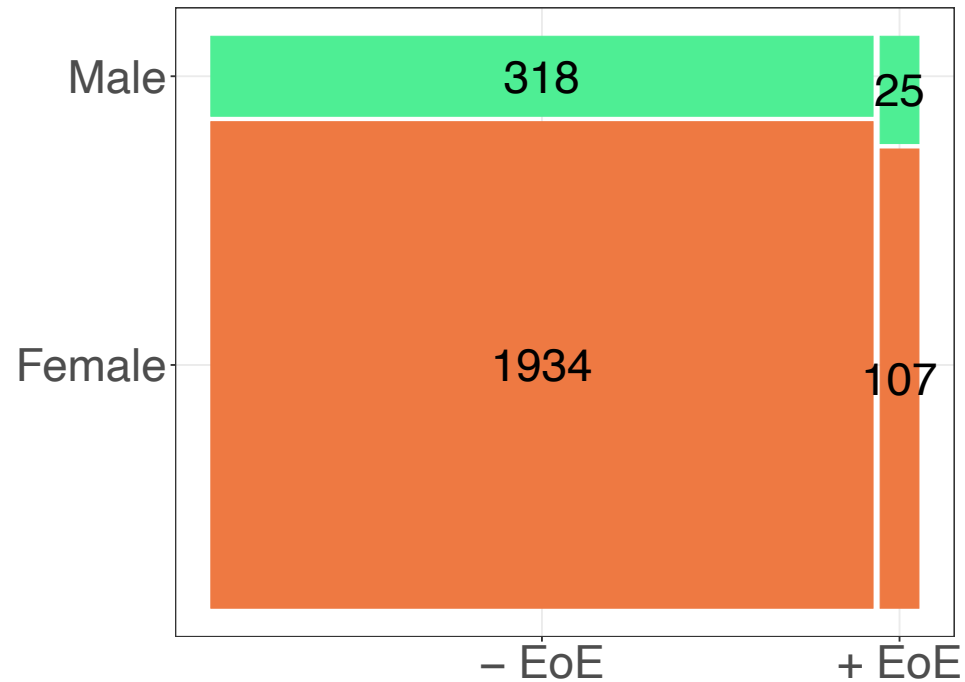

Supplement: NIHMS1877950-supplement-Fig_E2.pdf [file NIHMS1877950-supplement-Fig_E2.pdf]
